# Supplementary material for: Pinin interacts with C-terminal binding proteins for RNA alternative splicing and epithelial cell identity of human ovarian cancer cells
Source: PubMed Central journal article supplement (PMC4905481; doi:10.18632/oncotarget.7242), 2016-02-08
Supplement: oncotarget-07-11397-s001.pdf [file oncotarget-07-11397-s001.pdf]

## SUPPLEMENTARY FIGURES AND TABLES

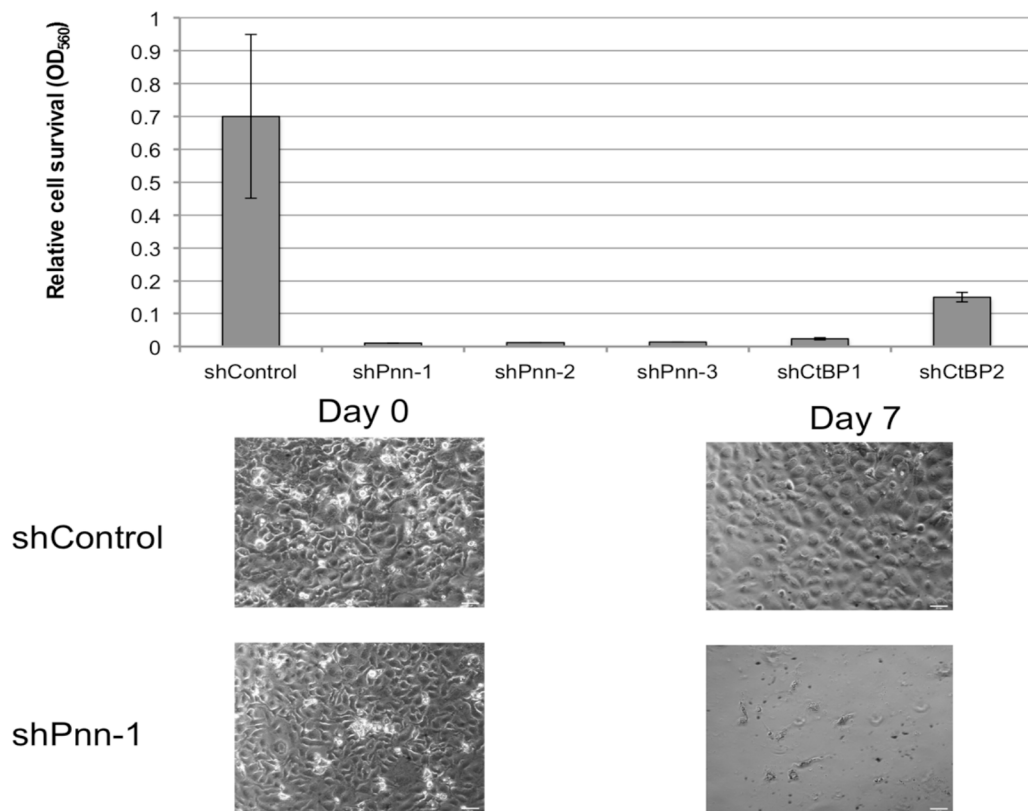

**Supplementary Figure S1: Ovarian cancer cells with Pnn-Knockdown showed reduced survival at confluence.** Control SKOV3-IP<sup>Luc</sup> ovarian cancer cells and cancer cells with knockdown of Pinin, CtBP1, or CtBP2 expression were seeded and allowed to grow until Day 7. Images were taken on Day 0 and Day 7, when the cells were washed twice with PBS and MTT assay was performed to show the viability of the remaining cells.

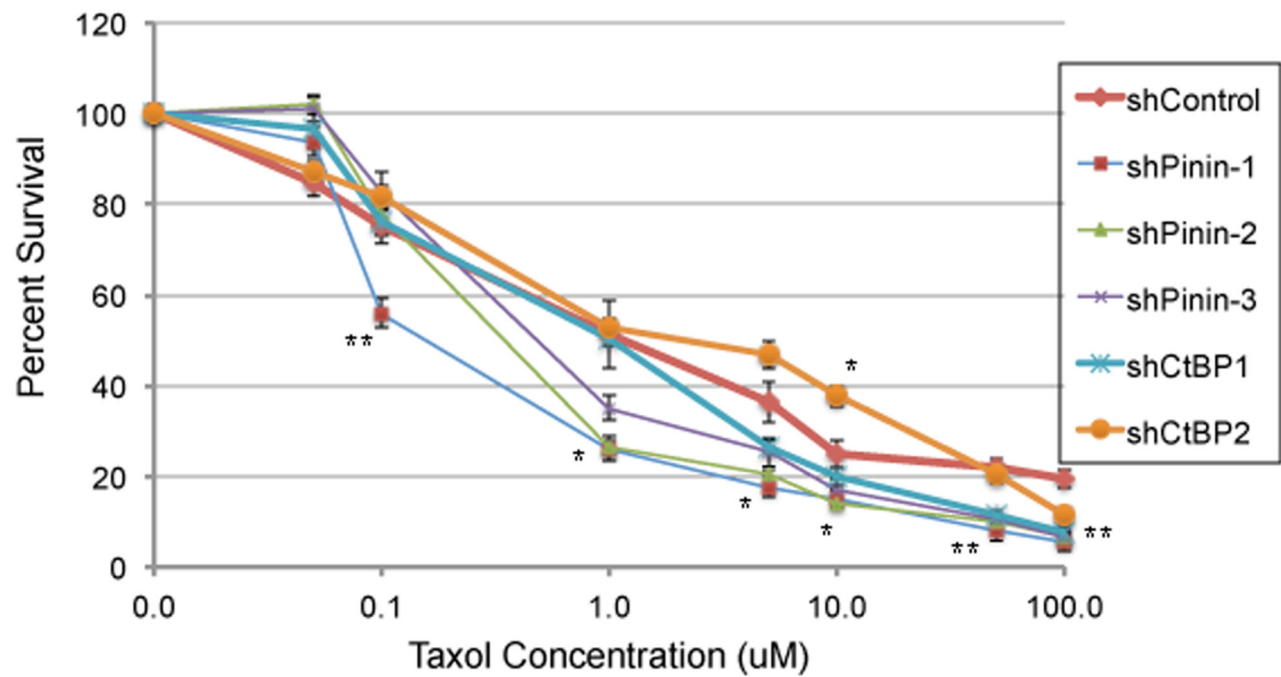

**Supplementary Figure S2: Ovarian cancer cells with Pnn-Knockdown showed increased sensitivity to Paclitaxel.** Control SKOV3-IP<sup>Luc</sup> ovarian cancer cells and cancer cells with knockdown of Pinin, CtBP1, or CtBP2 expression were treated with different concentrations of Paclitaxel for 48 hours and MTT assay was performed to determine the survival. \*  $p < 0.05$ , \*\*  $p < 0.01$ .

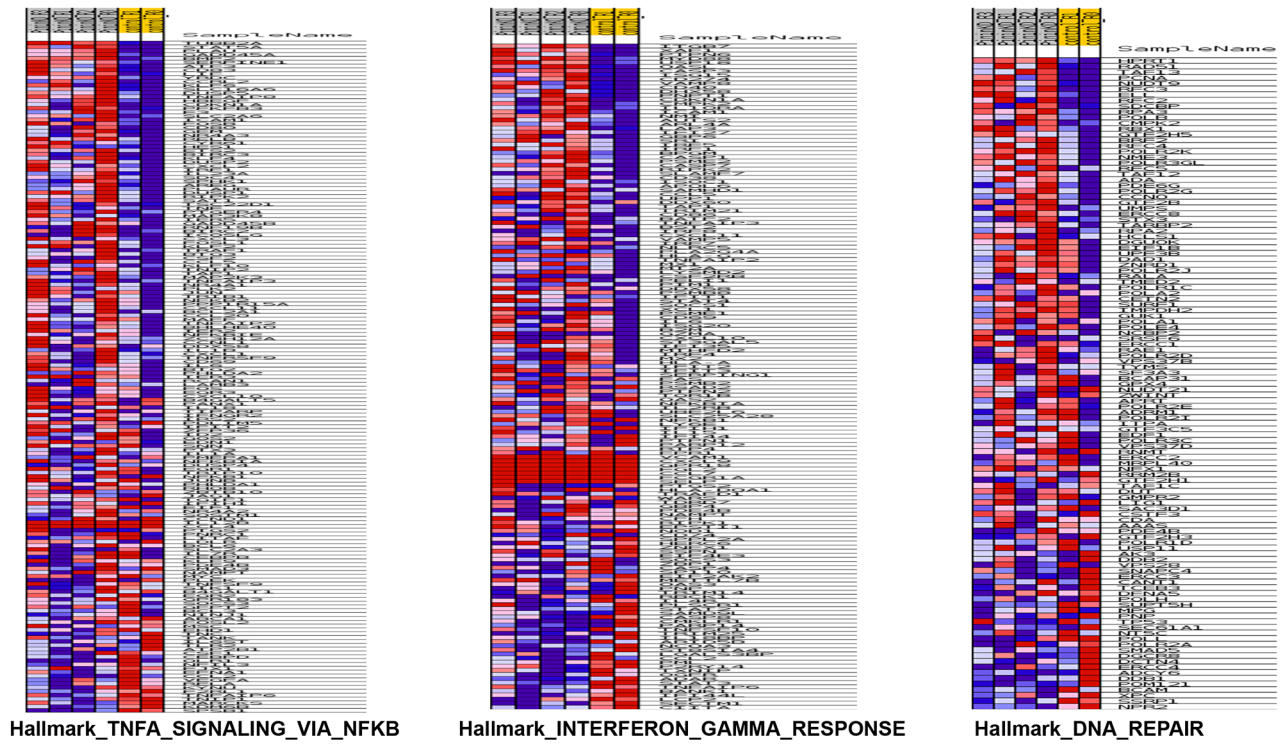

**Supplementary Figure S3: Heat maps showing differentially expressed genes for enriched pathways identified by GSEA in MSigDB.** Shown here are the heatmaps for 3 top pathways enriched for differentially expressed genes between Control and Pinin\_KD ovarian cancer cell lines identified by GSEA in the Hallmark pathway collection.

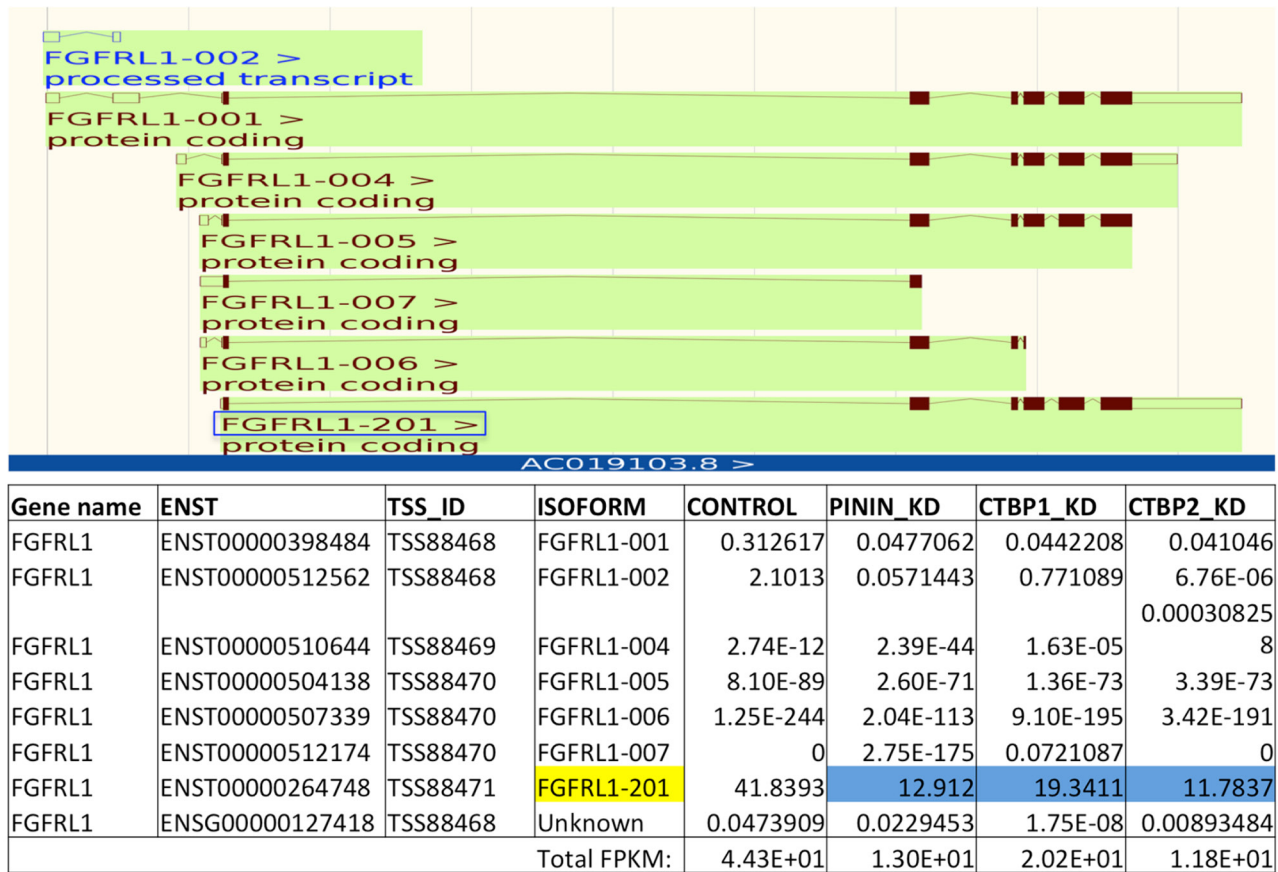

**Supplementary Figure S4: Isoform analysis shows that Pinin\_KD, CtBP1\_KD and CtBP2\_KD cells had significant reduction of the major FGFR1-coding isoform, which contributed to the reduced expression of the gene.** The exon intron structures of all the isoforms are shown in the top panel. Protein coding isoforms are shown in brown, whereas noncoding isoforms are shown in blue. The isoform with reduced expression in the knockdown cells is bracketed. The FPKM counts of the isoforms in different cell lines are shown in the bottom panel. The major protein coding isoform is shown in yellow, and the isoform with significant reduction in FPKMs in the knockdown cell lines are shown in blue.

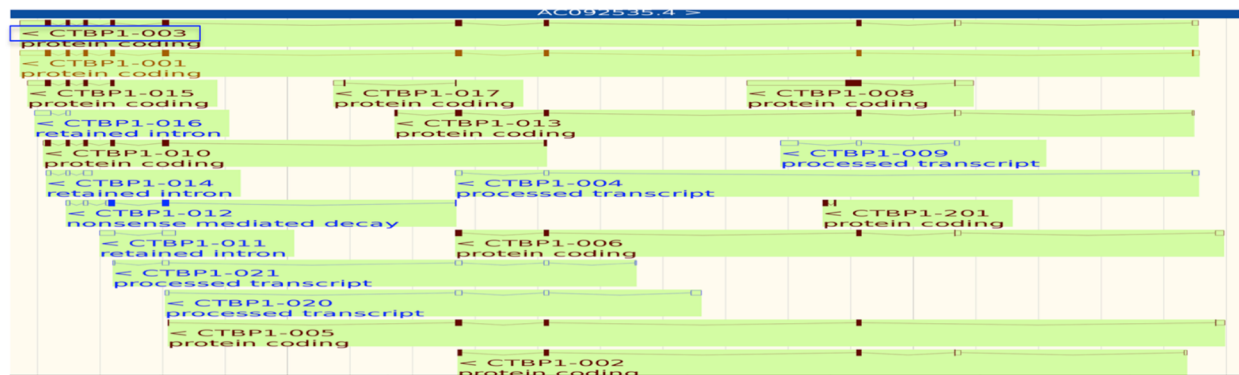

| Gene name   | ENST            | TSS_ID   | ISOFORM   | CONTROL   | PININ_KD  | CTBP1_KD  | CTBP2_KD    |
|-------------|-----------------|----------|-----------|-----------|-----------|-----------|-------------|
| CtBP1       | ENST00000290921 | TSS91083 | CTBP1-001 | 6.98114   | 4.60609   | 0.721896  | 14.6895     |
| CtBP1       | ENST00000513420 | TSS91094 | CTBP1-002 | 3.11265   | 0.106181  | 0.334882  | 1.74749     |
| CtBP1       | ENST00000382952 | TSS91083 | CTBP1-003 | 31.6519   | 4.8053    | 3.42078   | 25.2153     |
| CtBP1       | ENST00000514495 | TSS91083 | CTBP1-004 | 0.452334  | 1.89E-49  | 1.34E-63  | 5.80E-48    |
| CtBP1       | ENST00000506180 | TSS91084 | CTBP1-005 | 0.170225  | 1.33E-51  | 5.72E-44  | 1.83E-46    |
| CtBP1       | ENST00000515399 | TSS91084 | CTBP1-006 | 3.67E-44  | 1.44E-43  | 2.23E-22  | 1.11E-14    |
| CtBP1       | ENST00000510568 | TSS91095 | CTBP1-008 | 7.45E-12  | 7.07E-12  | 1.10E-116 | 2.90E-66    |
| CtBP1       | ENST00000515690 | TSS91096 | CTBP1-009 | 3.24E-100 | 4.27E-87  | 4.39E-88  | 2.02E-110   |
| CtBP1       | ENST00000504092 | TSS91087 | CTBP1-010 | 6.12261   | 0.0367922 | 0.691591  | 5.62E-16    |
| CtBP1       | ENST00000511907 | TSS91090 | CTBP1-011 | 1.2017    | 0.41502   | 0.0062574 | 0.0885213   |
| CtBP1       | ENST00000510739 | TSS91089 | CTBP1-012 | 0.026242  | 0.109016  | 0.506861  | 8.17E-36    |
| CtBP1       | ENST00000514210 | TSS91093 | CTBP1-013 | 0.0663491 | 1.28E-30  | 7.56E-09  | 0.000105437 |
| CtBP1       | ENST00000382950 | TSS91088 | CTBP1-014 | 1.08322   | 0.356113  | 1.24758   | 1.10197     |
| CtBP1       | ENST00000503594 | TSS91085 | CTBP1-015 | 21.3298   | 4.63435   | 1.17227   | 26.0949     |
| CtBP1       | ENST00000514596 | TSS91086 | CTBP1-016 | 4.92182   | 2.82436   | 0.825923  | 9.71E-11    |
| CtBP1       | ENST00000504784 | TSS91089 | CTBP1-017 | 0.0918895 | 3.73E-67  | 0.069677  | 0.123122    |
| CtBP1       | ENST00000514669 | TSS91092 | CTBP1-020 | 0.0729713 | 0.0283915 | 0.0773348 | 4.07E-12    |
| CtBP1       | ENST00000505826 | TSS91091 | CTBP1-021 | 2.33E-31  | 5.88E-22  | 0.352607  | 0.000175017 |
| CtBP1       | ENSG00000159692 | TSS91084 | Unknown   | 0.137136  | 0.0247996 | 0.0690548 | 0.0627799   |
| Total FPKM: |                 |          |           | 7.74E+01  | 1.79E+01  | 9.50E+00  | 6.91E+01    |

**Supplementary Figure S5: Isoform analysis of the CtBP1 transcripts shows that Pinin\_KD cancer cells had significant reduction of one major CtBP1-coding isoform, which contributed to the reduced expression of the gene.** The legend for this figure is the same as for Supplementary Figure S4. For the CtBP1\_KD cell line, though not significant at the individual level, many of the major coding isoforms were reduced (shaded in light blue), suggesting the effect of shRNA on reduced expression of CtBP1 in this cell line.

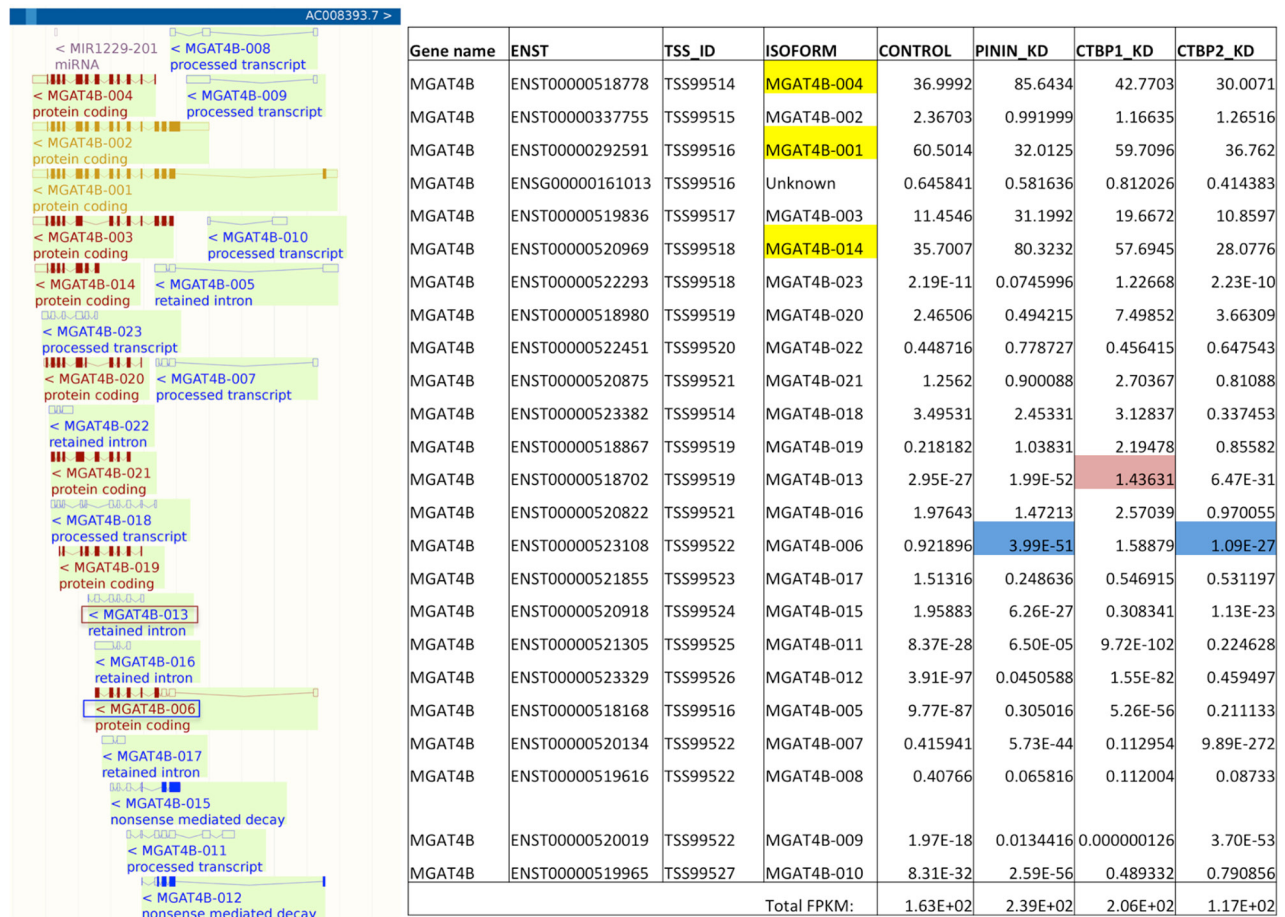

**Supplementary Figure S6: Isoform analysis of the MGAT4B transcripts shows that the isoforms with significantly altered expression in the knockdown cells are not the major coding isoforms and may not affect the expression of the gene.** The legend for this figure is the same as for Supplementary Figure S4. The upregulated isoform and the downregulated isoform are bracketed or shaded in pink and blue, respectively.

**Supplementary Table S1: Significant genes that are differentially expressed between Control and Pinin\_KD, CtBP1\_KD, and CtBP2\_KD cancer cells.**

See Supplementary File 1

**Supplementary Table S2: Significant transcripts that are differentially expressed between Control and Pinin\_KD, CtBP1\_KD, and CtBP2\_KD cancer cells.**

See Supplementary File 2
